# Supplementary material for: Anesthesiological risks in mucopolysaccharidoses
Source: PubMed Central journal article supplement (PMC6238251; doi:10.1186/s13052-018-0554-1), 2018-11-16

Identification

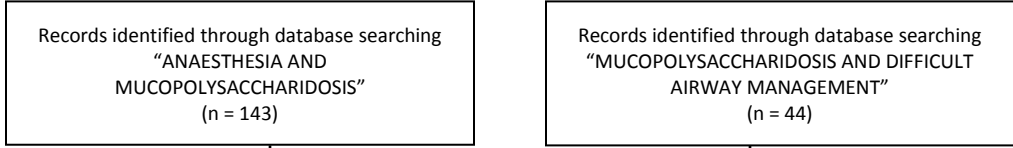

Screening

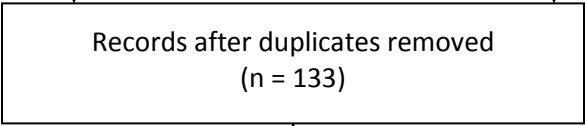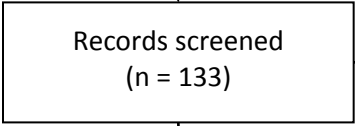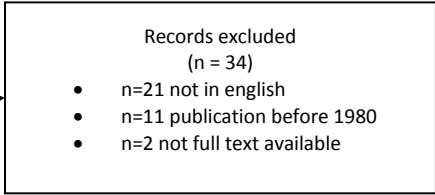

Eligibility

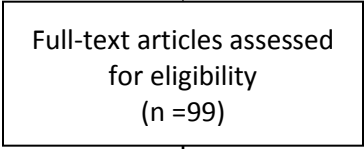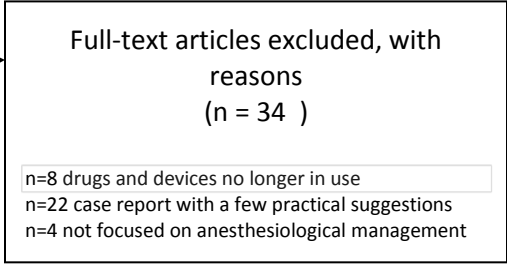

Included

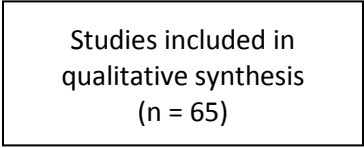

Supplement: 13052_2018_554_MOESM1_ESM.pdf [file 13052_2018_554_MOESM1_ESM.pdf]
